# Supplementary material for: Covalently functionalized carbon nanotube supported Pd nanoparticles for catalytic reduction of 4-nitrophenol
Source: Royal Society of Chemistry journal article supplement (doi:10.1039/c4nr00826j), 2014-01-01
Supplement: c4nr00826j1.pdf [file c4nr00826j1.pdf]

## Electronic Supplementary Information For Covalently functionalized carbon nanotubes supported Pd nanoparticles for catalytic reduction of 4-nitrophenol

Xianmo Gu,<sup>a,b</sup> Wei Qi,<sup>b</sup> Zhenhua Sun,<sup>\*b</sup> Liyun Zhang,<sup>b</sup> Wei Liu,<sup>b</sup> Xiaoli Pan,<sup>b</sup> Xianzhu Xu,<sup>\*a</sup>  
Dangsheng Su<sup>\*b</sup>

**Table S1** The XPS data summary of different samples.

| Sample  | O (at. %) | O1 (C=O)<br>(at. %) | O2 (O=C-O)<br>(at. %) | O3 (C-OH)<br>(at. %)      | C2 (C-<br>OH)/% <sup>b</sup> |
|---------|-----------|---------------------|-----------------------|---------------------------|------------------------------|
| NF-CNT  | 0.77      | 0.16                | 0.22                  | 0.38 (49.8%) <sup>a</sup> | 10.1                         |
| CNT-160 | 2.36      | 0.33                | 0.72                  | 1.31 (55.6%) <sup>a</sup> | 11.6                         |
| CNT-200 | 5.11      | 0.50                | 1.32                  | 3.29 (64.5%) <sup>a</sup> | 14.9                         |
| CNT-220 | 5.36      | 0.45                | 1.24                  | 3.68 (68.6%) <sup>a</sup> | 15.3                         |

a. the percentage is relative intensity of C-OH groups from O1s core level spectra of different samples; b the percentage is relative intensity of C-OH groups from C1s core level spectra of different;

**Table S2** Sample denotations and comparison of the fit parameters from the peaks fitted in the Raman spectra of CNT samples.

| Sample  | Description | Position [ $\text{cm}^{-1}$ ] | Area (a.u.) | FWHM [ $\text{cm}^{-1}$ ] | $I_D/I_G$ |
|---------|-------------|-------------------------------|-------------|---------------------------|-----------|
| NF-CNT  | D           | 1318.7                        | 14.1        | 27.8                      | 2.61      |
|         | G           | 1569.4                        | 5.4         | 22.6                      |           |
|         | D'          | 1600.7                        | 2.7         | 16.6                      |           |
|         | D3          | 1504.1                        | 0.9         | 59.0                      |           |
| CNT-160 | D           | 1319.1                        | 13.5        | 29                        | 2.55      |
|         | G           | 1570                          | 5.3         | 24.1                      |           |
|         | D'          | 1601.2                        | 2.6         | 16.8                      |           |
|         | D3          | 1502.6                        | 1.1         | 60.3                      |           |
| CNT-200 | D           | 1320.3                        | 14.1        | 27.7                      | 2.43      |
|         | G           | 1571.4                        | 5.8         | 24.3                      |           |
|         | D'          | 1602.1                        | 2.5         | 16                        |           |
|         | D3          | 1483.2                        | 1.4         | 69.5                      |           |
| CNT-220 | D           | 1323.2                        | 13.9        | 29.3                      | 2.39      |
|         | G           | 1573.4                        | 5.8         | 24.6                      |           |
|         | D'          | 1604.8                        | 2.7         | 16.9                      |           |
|         | D3          | 1497.9                        | 2.0         | 69.5                      |           |

**Table S3** Summary of XPS Pd 3d core level of different composites.

| Sample                      |                  | 3d <sub>5/2</sub> /eV | 3d <sub>3/2</sub> /eV | Pd <sup>0</sup> /% | Pd <sup>2+</sup> /% |
|-----------------------------|------------------|-----------------------|-----------------------|--------------------|---------------------|
| Pd NPs/NF-CNT               | Pd <sup>0</sup>  | 335.7                 | 341                   | 86.9               | 13.1                |
|                             | Pd <sup>2+</sup> | 337.8                 | 343                   |                    |                     |
| Pd NPs/O-CNT                | Pd <sup>0</sup>  | 336                   | 341.3                 | 83.4               | 16.6                |
|                             | Pd <sup>2+</sup> | 337.7                 | 342.9                 |                    |                     |
| Pd NPs/CNT-220 <sup>a</sup> | Pd <sup>0</sup>  | 335.8                 | 341.1                 | 81.3               | 18.7                |
|                             | Pd <sup>2+</sup> | 338.2                 | 343.4                 |                    |                     |
| Pd NPs/CNT-220 <sup>b</sup> | Pd <sup>0</sup>  | 335.9                 | 341.2                 | 84.2               | 15.8                |
|                             | Pd <sup>2+</sup> | 338                   | 343.2                 |                    |                     |

a. this sample used before catalytic reaction; b this sample used after catalytic reaction.

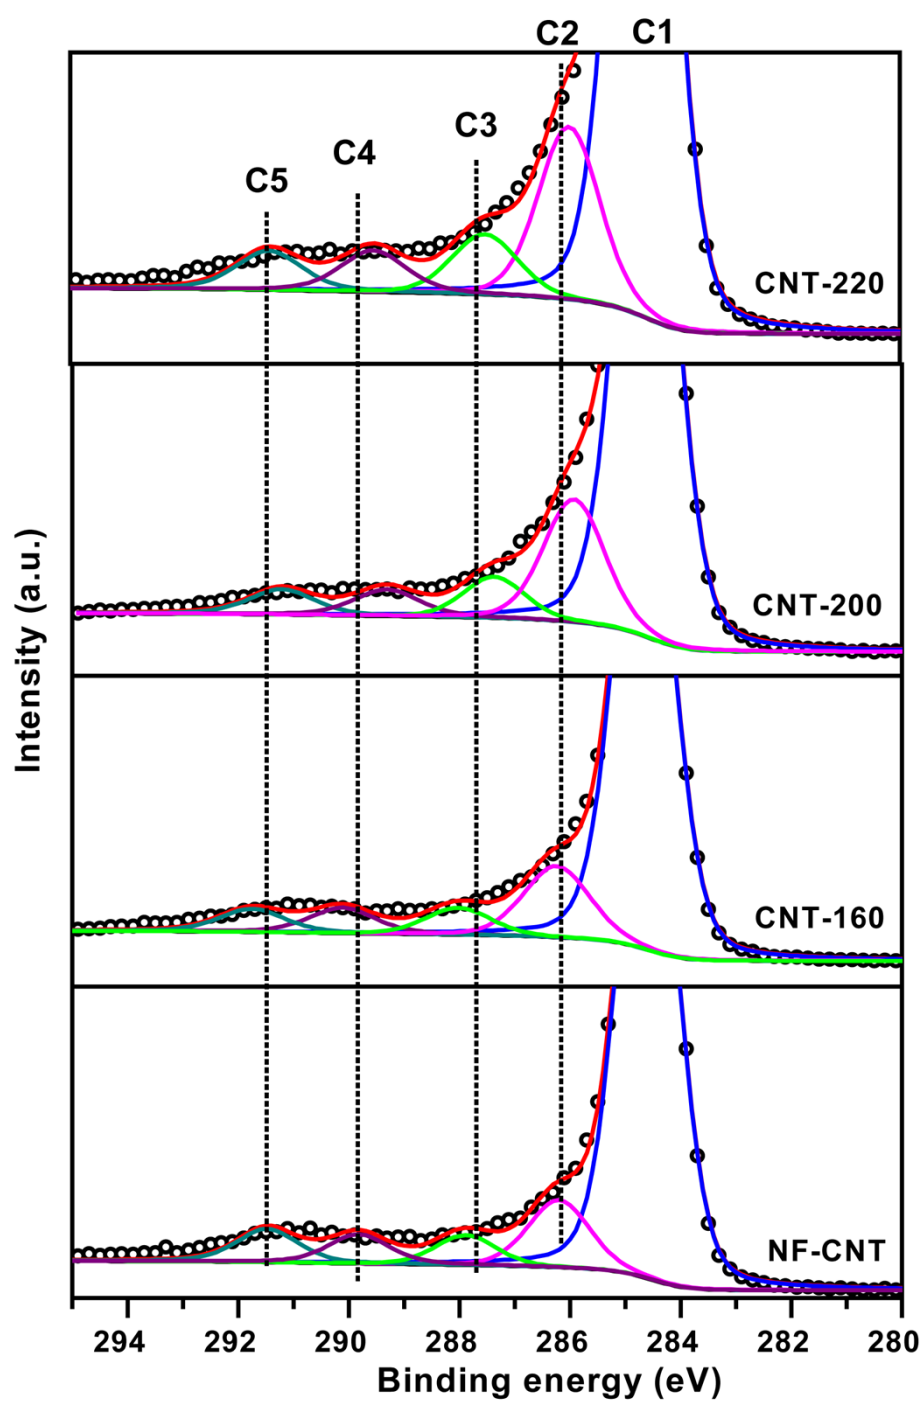

**Figure S1** The curve fitted C1s XPS of NF-CNT, CNT-160, CNT-200 and CNT-220. To visualize the component and shakeup peaks, component peaks C1 are shown as cut-out.

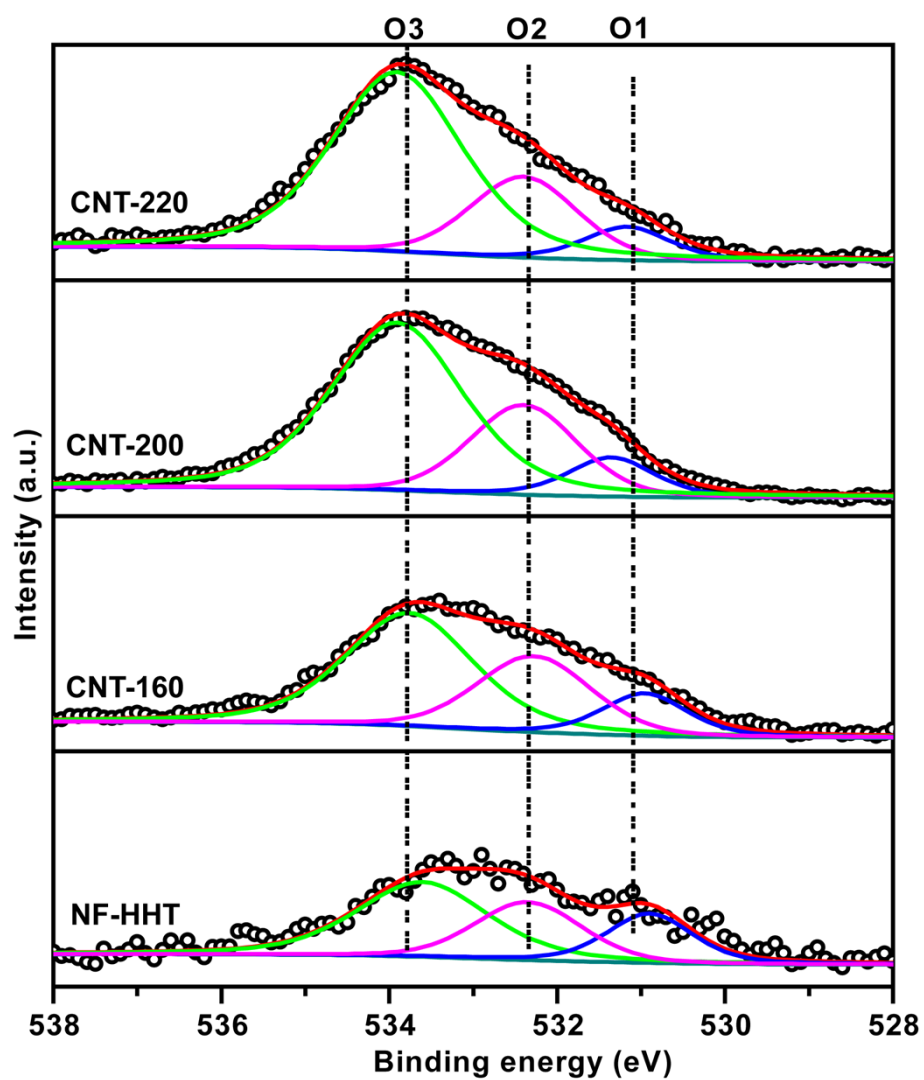

**Figure S2 T** The curve fitted O1s XPS of NF-CNT, CNT-160, CNT-200 and CNT-220.

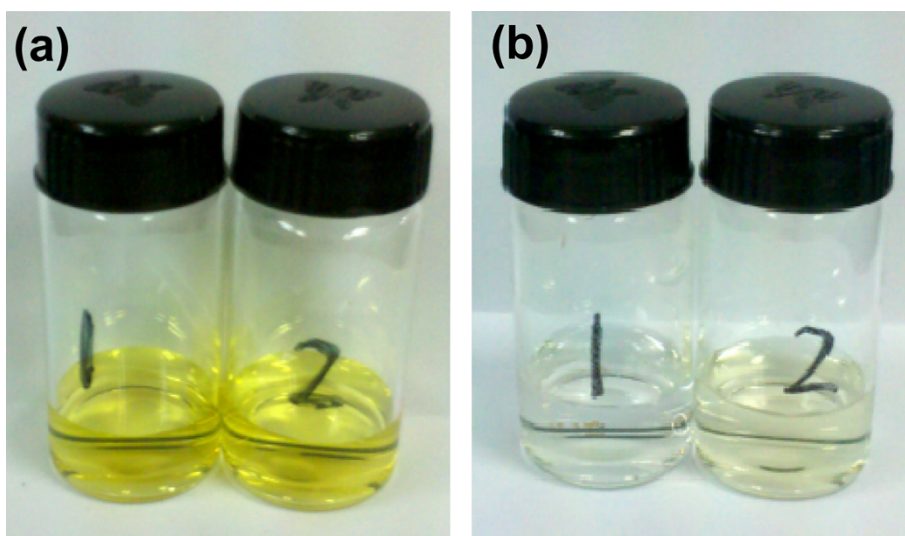

**Figure S3** Photograph of solution color Pd NPs supported CNTs before (a) and after (b); CNT-220 was added in the **bottle 1** and NF-CNT was added in the **bottle 2**.

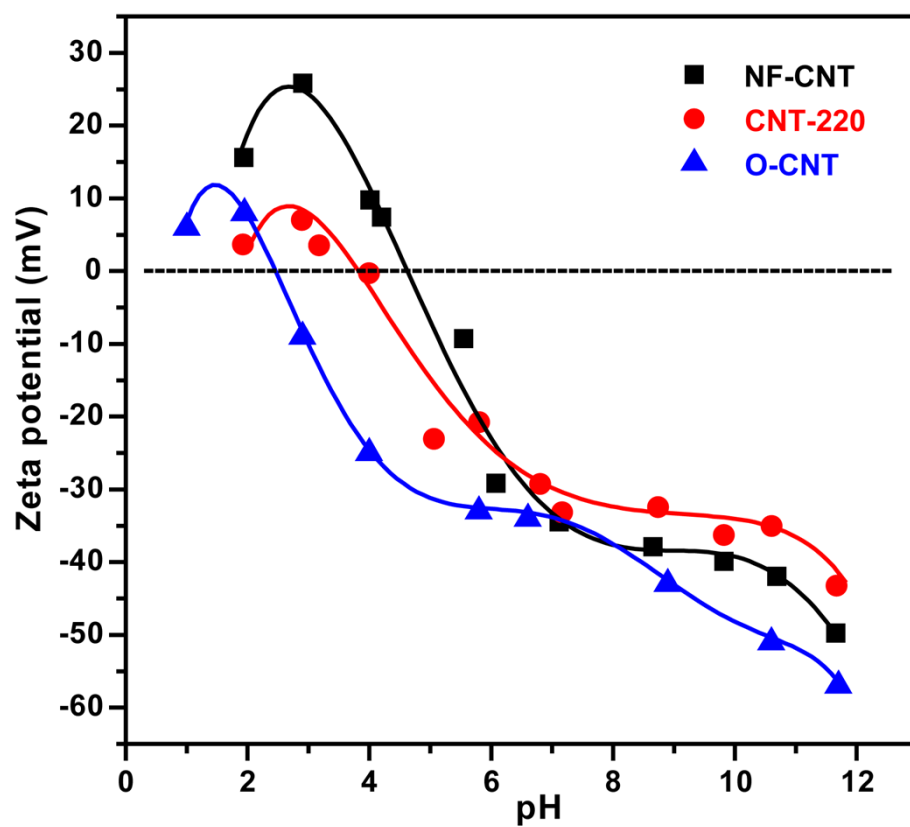

**Figure S4** The Zeta potential for NF-CNT, CNT-220 and O-CNT as function of pH.

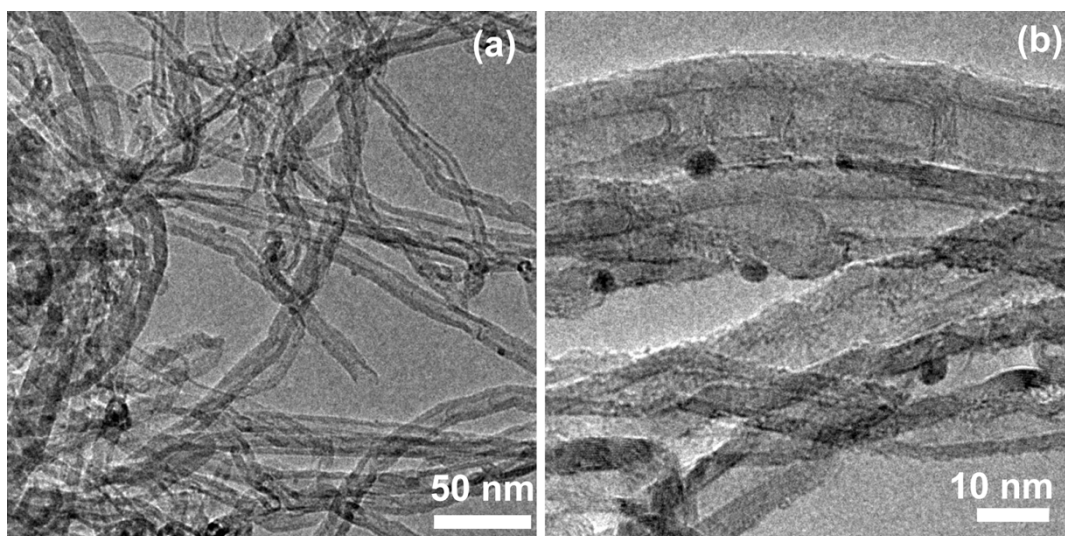

**Figure S5** The TEM images of Pd NPs/O-CNT composites.



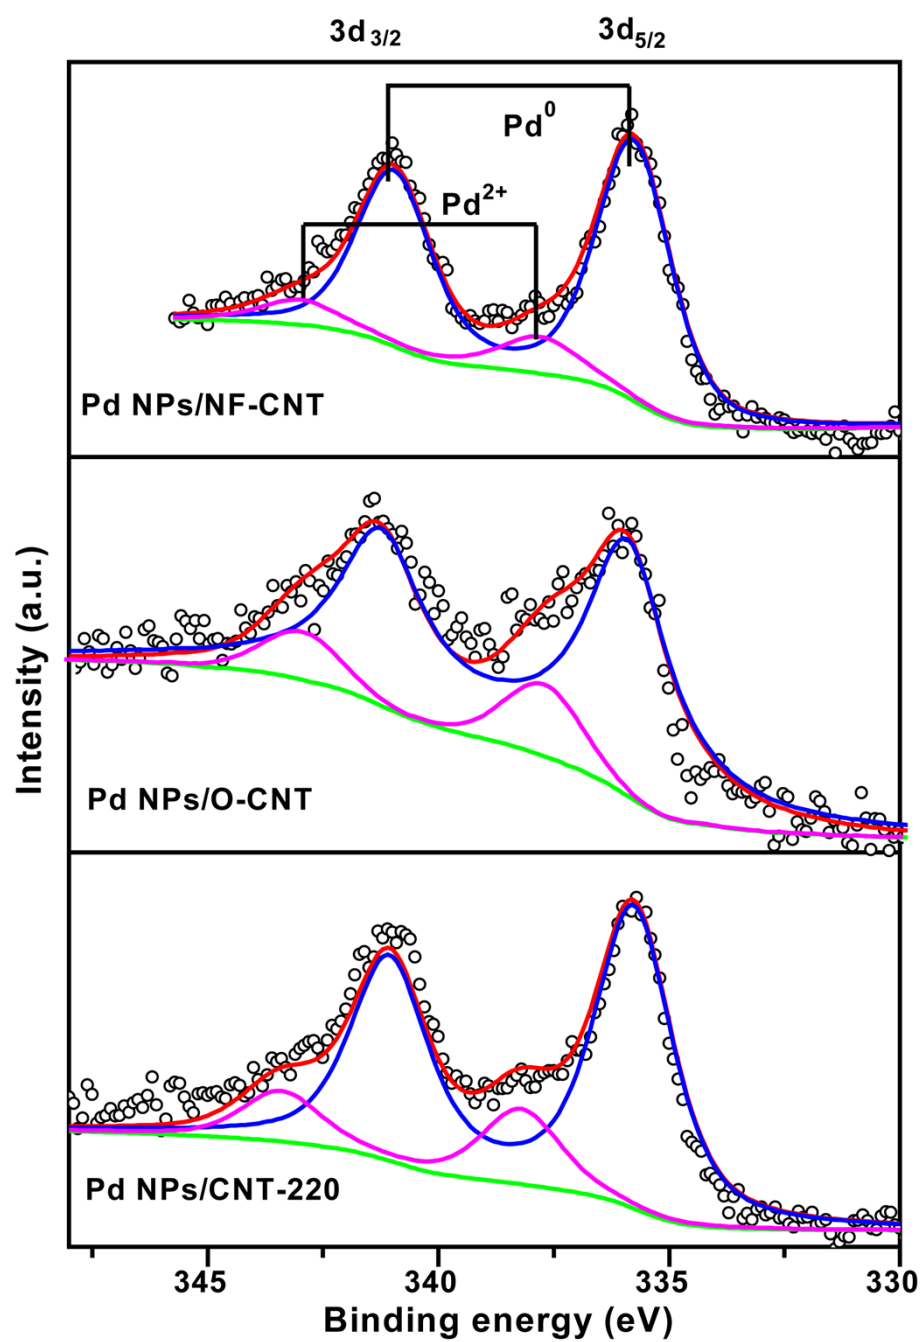

**Figure S6** The curve fitted Pd3d XPS of different nanocomposites.

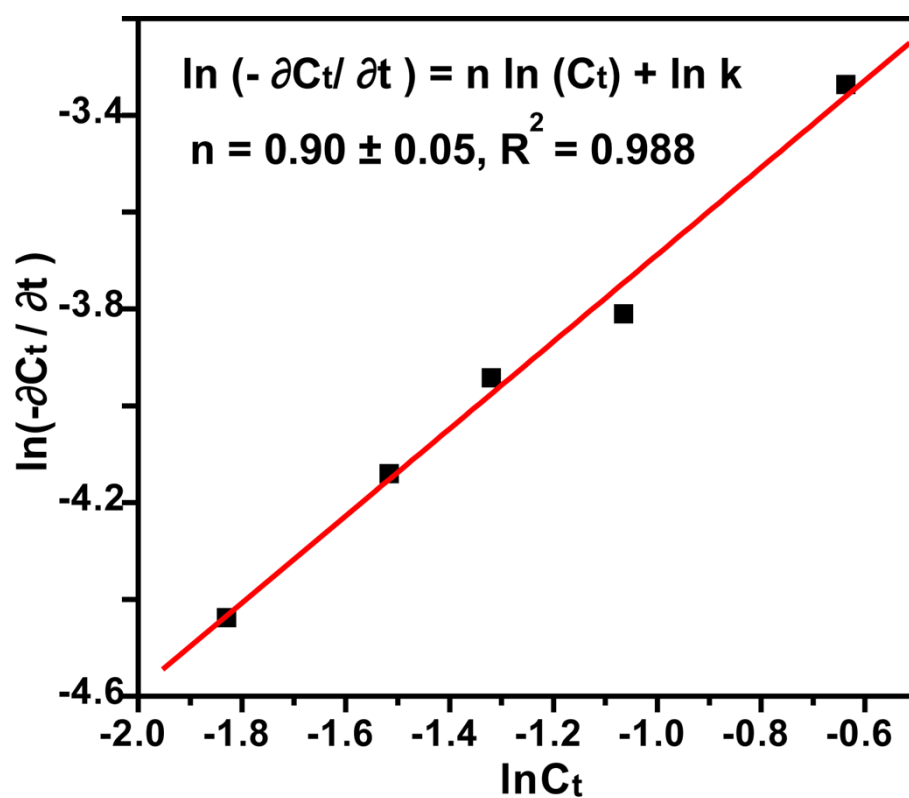

**Figure S7** Reaction kinetics study of the reduction of 4-NP over Pd NPs/NF-CNT by UV-vis spectroscopy: the  $\ln(-\partial C_t / \partial t)$  versus  $\ln(C_t)$  plot in which the slope of the linearly fitted line ( $0.90 \pm 0.05$ ) corresponds to the reaction order with respect to 4-NP ( $n$ ), indicating pseudo-first-order reaction kinetics.

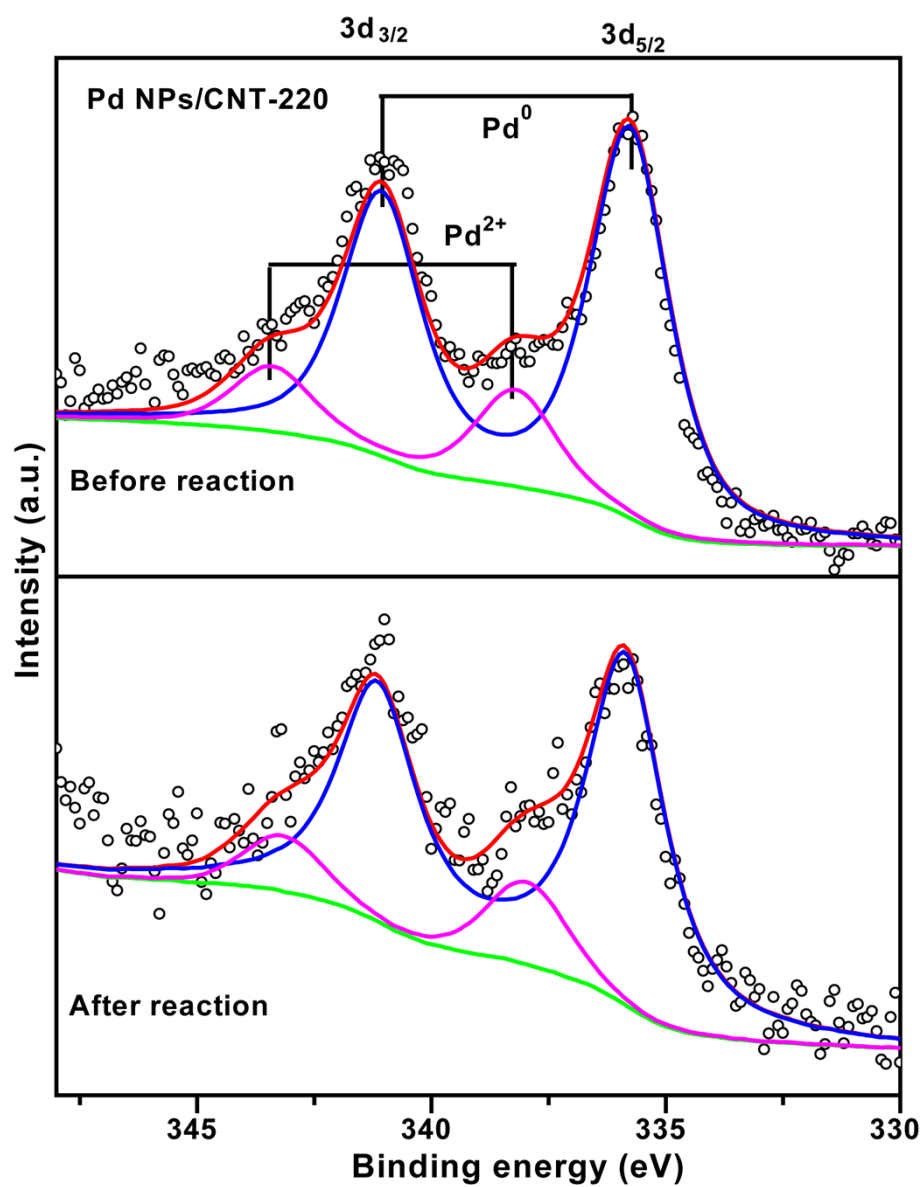

**Figure S8** The curve fitted Pd3d XPS of Pd NPs/CNT-220 before and after the catalytic reaction.
